# Supplementary material
Source: HighWire-hosted journal article supplement (https://gut.bmj.com/content/69/1/177)
Supplement: inline-supplementary-material-6 [file inline-supplementary-material-6.xlsx]

## Sheet: Coversheet
	TrueMass® Complex Lipid Panel
	Dataset S2	Lipidomics Data
	Date:	2016-08-19
	Project Code:	UCSF-02-16CLP
	Client:	Xin Chen
	Organization:	University of California, San Francisco
	Quantitative Units:	Micromolar (uM)
	Worksheet	Sheet Name		Data Type
	1	Coversheet		NA
	2	Lipid Class Concentrations		Quantitative
	3	Lipid Class Compositions		Mole%
	4	Species Concentrations		Quantitative
	5	Species Compositions		Mole%
	6	Fatty Acid Concentrations		Quantitative
	7	Fatty Acid Compositions		Mole%
	8	Methods		NA
	Abbreviation	Name	Group
	CE	Cholesteryl ester	Neutral Lipids
	TAG	Triacylglycerol
	DAG	Diacylglycerol
	FFA	Free fatty acid
	PC	Phosphatidylcholine	Phospholipids
	PE	Phosphatidylethanolamine
	PI	Phosphatidylinositol
	LPC	Lysophosphatidylcholine
	LPE	Lysophosphatidylethanolamine
	SM	Sphingomyelin	Sphingolipids
	CER	Ceramide
	HCER	Hexosylceramide
	LCER	Lactosylceramide
	DCER	Dihydroceramide
	Total	Total lipid in sample

## Sheet: Lipid Class Concentrations
Complex Lipid Panel: Lipid Class Concentrations
Project Code:	UCSF-02-16CLP
CLIENT_IDENTIFIER	SAMPLE_NAME	TREATMENT	SAMPLE_NUMBER	GROUP_NAME	GROUP_NUMBER	CLIENT_MATRIX	SAMPLE_AMOUNT	QUANTITATIVE_UNITS	CE	TAG	DAG	FFA	PC	PE	PI	LPC	LPE	SM	CER	HCER	LCER	DCER
ACF_pos_T1	UCSF-01415	HCC	1	Fasn_neg_ mice injected with PLASMIDS	1	Mouse Liver	100mg	uM	1628.27	2699.78	152.92	288.618	1269.71	269.894	35.0297	154.354	8.432	203.429	7.696	8.1343	0.3454	0.4741
ACF_pos_T2	UCSF-01416	HCC	2	Fasn_neg_ mice injected with PLASMIDS	1	Mouse Liver	100mg	uM	1532.32	2515.05	144.992	239.798	1283.78	269.96	38.6597	151.145	7.6572	208.163	7.4911	9.334	0.3536	0.4585
ACF_pos_T3	UCSF-01417	HCC	3	Fasn_neg_ mice injected with PLASMIDS	1	Mouse Liver	100mg	uM	1743.56	2388.93	115.169	287.872	1529.47	379.601	28.4697	168.062	10.7515	243.422	8.3513	8.6229	0.516	0.5691
ACF_pos_T4	UCSF-01418	HCC	4	Fasn_neg_ mice injected with PLASMIDS	1	Mouse Liver	100mg	uM	1313.79	1803.92	155.104	417.694	1551.96	312.658	34.5403	162.244	9.4851	235.181	9.8501	10.8649	0.8012	0.915
ACF_pos_T5	UCSF-01419	HCC	5	Fasn_neg_ mice injected with PLASMIDS	1	Mouse Liver	100mg	uM	1193.49	4822.79	218.403	350.043	1197.92	321.384	37.8372	109.374	9.639	190.219	9.4045	9.4049	0.8292	0.6456
ACF_pos_T6	UCSF-01420	HCC	6	Fasn_neg_ mice injected with PLASMIDS	1	Mouse Liver	100mg	uM	832.967	3140.41	188.112	296.557	871.817	227.407	28.1477	77.2956	7.4577	146.233	7.5775	6.1448	0.5306	0.5649
ACF_neg_T1	UCSF-01421	HCC	7	Fasn_pos_ mice injected with PLASMIDS	2	Mouse Liver	100mg	uM	853.366	7784.05	346.515	508.557	1523.83	406.526	45.7748	103.362	10.2835	219.074	10.9672	6.7045	0.4101	0.7427
ACF_neg_T2	UCSF-01422	HCC	8	Fasn_pos_ mice injected with PLASMIDS	2	Mouse Liver	100mg	uM	962.833	7040.62	333.086	508.371	1478.71	371.364	37.0766	114.282	9.4762	216.187	12.3963	8.8184	0.3955	0.8462
ACF_neg_T3	UCSF-01423	HCC	9	Fasn_pos_ mice injected with PLASMIDS	2	Mouse Liver	100mg	uM	1034.59	15211.8	515.806	741.576	1292.43	332.705	27.23	81.1006	8.3943	202.21	10.6444	8.077	0.4768	0.7312
ACF_neg_T4	UCSF-01424	HCC	10	Fasn_pos_ mice injected with PLASMIDS	2	Mouse Liver	100mg	uM	776.423	13606.6	443.212	610.726	1464.1	376.548	27.7656	87.6287	9.012	201.527	11.8799	7.3289	0.427	0.6944
ACF_neg_T5	UCSF-01425	HCC	11	Fasn_pos_ mice injected with PLASMIDS	2	Mouse Liver	100mg	uM	698.163	7654.55	315.075	636.672	1730.49	499.397	37.8872	101.124	13.2548	230.788	12.5111	7.6118	0.4698	0.7404
ACF_neg_T6	UCSF-01426	HCC	12	Fasn_pos_ mice injected with PLASMIDS	2	Mouse Liver	100mg	uM	681.827	7219.84	289.332	532.892	1677.05	512.291	36.0936	105.867	13.6263	234.785	12.3746	7.8047	0.451	1.1569
ACF_pos_NL1	UCSF-01427	NL	13	Fasn_neg_ mice NORMAL LIVER	3	Mouse Liver	100mg	uM	197.223	6997.48	244.059	555.473	1381.33	498.885	37.512	82.9967	12.1577	253.454	5.8439	3.9152	0.2572	0.4814
ACF_pos_NL2	UCSF-01428	NL	14	Fasn_neg_ mice NORMAL LIVER	3	Mouse Liver	100mg	uM	200.686	5969.88	176.911	473.513	1350.42	510.079	48.6243	77.9673	14.1601	235.959	5.6323	4.0414	0.3195	0.4789
ACF_pos_NL3	UCSF-01429	NL	15	Fasn_neg_ mice NORMAL LIVER	3	Mouse Liver	100mg	uM	257.382	5175.07	198.599	498.848	1649.27	641.865	35.4075	85.2872	15.2788	318.313	6.074	3.7615	0.2162	0.6008
ACF_pos_NL4	UCSF-01430	NL	16	Fasn_neg_ mice NORMAL LIVER	3	Mouse Liver	100mg	uM	228.443	4717.99	239.693	687.562	1619.36	652.641	41.3176	83.6975	18.4823	317.146	6.6918	3.3575	0.238	0.5352
ACF_pos_NL5	UCSF-01431	NL	17	Fasn_neg_ mice NORMAL LIVER	3	Mouse Liver	100mg	uM	192.422	4548.09	202.279	585.365	1574.58	711.435	32.2433	66.3595	15.2936	361.059	7.9331	4.2428	0.2452	0.7314
ACF_pos_NL6	UCSF-01432	NL	18	Fasn_neg_ mice NORMAL LIVER	3	Mouse Liver	100mg	uM	192.066	4206.35	210.576	770.003	1632.85	753.742	36.9645	70.5679	15.8363	368.8	8.0308	3.9237	0.2344	0.6916
ACF_neg_NL5	UCSF-01433	NL	19	Fasn_pos_ mice NORMAL LIVER	4	Mouse Liver	100mg	uM	112.152	5978.51	187.572	790.949	1779.38	578.466	43.8884	94.6898	19.4548	317.757	7.9975	4.5673	0.5867	0.6343
ACF_neg_NL6	UCSF-01434	NL	20	Fasn_pos_ mice NORMAL LIVER	4	Mouse Liver	100mg	uM	105.028	5120.79	170.197	567.349	1657.18	629.771	37.4045	70.9043	14.5888	337.096	7.7867	3.4441	0.5081	0.6767
ACF_neg_NL7	UCSF-01435	NL	21	Fasn_pos_ mice NORMAL LIVER	4	Mouse Liver	100mg	uM	103.48	1921.79	99.4646	345.01	1724.27	675.068	44.7677	63.5304	15.7745	308.646	8.1381	3.3997	0.3042	0.5794
ACF_neg_NL8	UCSF-01436	NL	22	Fasn_pos_ mice NORMAL LIVER	4	Mouse Liver	100mg	uM	102.275	1404.11	84.9905	392.866	1843.11	772.023	41.3311	69.5529	16.0514	361.627	8.7077	3.3475	0.2752	0.8003
ACF_neg_NL9	UCSF-01437	NL	23	Fasn_pos_ mice NORMAL LIVER	4	Mouse Liver	100mg	uM	99.6336	1610.03	77.6246	343.301	1765.72	613.685	43.6698	72.3465	18.4871	316.936	8.2097	4.5253	0.3037	0.7938
ACF_neg_NL10	UCSF-01438	NL	24	Fasn_pos_ mice NORMAL LIVER	4	Mouse Liver	100mg	uM	176.416	7465.59	238.6	1118.2	1637.35	741.05	40.1913	74.954	19.6905	343.472	8.0519	3.6591	0.3059	0.5782

## Sheet: Lipid Class Compositions
Complex Lipid Panel: Lipid Class Compositions (Mole%)
Project Code:	UCSF-02-16CLP
CLIENT_IDENTIFIER	SAMPLE_NAME	SAMPLE_NUMBER	GROUP_NAME	GROUP_NUMBER	CLIENT_MATRIX	SAMPLE_AMOUNT	QUANTITATIVE_UNITS	CE	TAG	DAG	FFA	PC	PE	PI	LPC	LPE	SM	CER	HCER	LCER	DCER
ACF_pos_T1	UCSF-01415	1	Fasn_neg_ mice injected with PLASMIDS	1	Mouse Liver	100mg	mole %	24.2047	40.1329	2.2732	4.2904	18.8746	4.0121	0.5207	2.2945	0.1253	3.024	0.1144	0.1209	0.0051	0.007
ACF_pos_T2	UCSF-01416	2	Fasn_neg_ mice injected with PLASMIDS	1	Mouse Liver	100mg	mole %	23.9083	39.2414	2.2623	3.7415	20.0304	4.2121	0.6032	2.3583	0.1195	3.2479	0.1169	0.1456	0.0055	0.0072
ACF_pos_T3	UCSF-01417	3	Fasn_neg_ mice injected with PLASMIDS	1	Mouse Liver	100mg	mole %	25.2202	34.5552	1.6659	4.164	22.1234	5.4908	0.4118	2.431	0.1555	3.521	0.1208	0.1247	0.0075	0.0082
ACF_pos_T4	UCSF-01418	4	Fasn_neg_ mice injected with PLASMIDS	1	Mouse Liver	100mg	mole %	21.8273	29.9704	2.5769	6.9396	25.7843	5.1945	0.5739	2.6955	0.1576	3.9073	0.1636	0.1805	0.0133	0.0152
ACF_pos_T5	UCSF-01419	5	Fasn_neg_ mice injected with PLASMIDS	1	Mouse Liver	100mg	mole %	14.0884	56.9304	2.5781	4.1321	14.1408	3.7938	0.4466	1.2911	0.1138	2.2454	0.111	0.111	0.0098	0.0076
ACF_pos_T6	UCSF-01420	6	Fasn_neg_ mice injected with PLASMIDS	1	Mouse Liver	100mg	mole %	14.2846	53.8551	3.2259	5.0857	14.9508	3.8998	0.4827	1.3255	0.1279	2.5078	0.1299	0.1054	0.0091	0.0097
ACF_neg_T1	UCSF-01421	7	Fasn_pos_ mice injected with PLASMIDS	2	Mouse Liver	100mg	mole %	7.2196	65.854	2.9316	4.3025	12.8918	3.4393	0.3873	0.8745	0.087	1.8534	0.0928	0.0567	0.0035	0.0063
ACF_neg_T2	UCSF-01422	8	Fasn_pos_ mice injected with PLASMIDS	2	Mouse Liver	100mg	mole %	8.6785	63.4607	3.0023	4.5822	13.3283	3.3473	0.3342	1.0301	0.0854	1.9486	0.1117	0.0795	0.0036	0.0076
ACF_neg_T3	UCSF-01423	9	Fasn_pos_ mice injected with PLASMIDS	2	Mouse Liver	100mg	mole %	5.3144	78.1384	2.6495	3.8093	6.6388	1.709	0.1399	0.4166	0.0431	1.0387	0.0547	0.0415	0.0024	0.0038
ACF_neg_T4	UCSF-01424	10	Fasn_pos_ mice injected with PLASMIDS	2	Mouse Liver	100mg	mole %	4.4055	77.2055	2.5148	3.4653	8.3075	2.1366	0.1575	0.4972	0.0511	1.1435	0.0674	0.0416	0.0024	0.0039
ACF_neg_T5	UCSF-01425	11	Fasn_pos_ mice injected with PLASMIDS	2	Mouse Liver	100mg	mole %	5.8479	64.1153	2.6391	5.3328	14.4947	4.183	0.3173	0.847	0.111	1.9331	0.1048	0.0638	0.0039	0.0062
ACF_neg_T6	UCSF-01426	12	Fasn_pos_ mice injected with PLASMIDS	2	Mouse Liver	100mg	mole %	6.0203	63.7491	2.5547	4.7053	14.8079	4.5234	0.3187	0.9348	0.1203	2.0731	0.1093	0.0689	0.004	0.0102
ACF_pos_NL1	UCSF-01427	13	Fasn_neg_ mice NORMAL LIVER	3	Mouse Liver	100mg	mole %	1.9202	68.128	2.3762	5.4081	13.4488	4.8572	0.3652	0.8081	0.1184	2.4677	0.0569	0.0381	0.0025	0.0047
ACF_pos_NL2	UCSF-01428	14	Fasn_neg_ mice NORMAL LIVER	3	Mouse Liver	100mg	mole %	2.213	65.8297	1.9508	5.2214	14.8911	5.6246	0.5362	0.8597	0.1561	2.6019	0.0621	0.0446	0.0035	0.0053
ACF_pos_NL3	UCSF-01429	15	Fasn_neg_ mice NORMAL LIVER	3	Mouse Liver	100mg	mole %	2.8965	58.2386	2.235	5.6139	18.5604	7.2233	0.3985	0.9598	0.1719	3.5822	0.0684	0.0423	0.0024	0.0068
ACF_pos_NL4	UCSF-01430	16	Fasn_neg_ mice NORMAL LIVER	3	Mouse Liver	100mg	mole %	2.651	54.7511	2.7816	7.979	18.7923	7.5737	0.4795	0.9713	0.2145	3.6804	0.0777	0.039	0.0028	0.0062
ACF_pos_NL5	UCSF-01431	17	Fasn_neg_ mice NORMAL LIVER	3	Mouse Liver	100mg	mole %	2.3177	54.7812	2.4364	7.0507	18.9656	8.5691	0.3884	0.7993	0.1842	4.3489	0.0956	0.0511	0.003	0.0088
ACF_pos_NL6	UCSF-01432	18	Fasn_neg_ mice NORMAL LIVER	3	Mouse Liver	100mg	mole %	2.3223	50.8588	2.5461	9.3101	19.7427	9.1135	0.4469	0.8532	0.1915	4.4592	0.0971	0.0474	0.0028	0.0084
ACF_neg_NL5	UCSF-01433	19	Fasn_pos_ mice NORMAL LIVER	4	Mouse Liver	100mg	mole %	1.1309	60.2879	1.8915	7.976	17.9434	5.8333	0.4426	0.9549	0.1962	3.2043	0.0806	0.0461	0.0059	0.0064
ACF_neg_NL6	UCSF-01434	20	Fasn_pos_ mice NORMAL LIVER	4	Mouse Liver	100mg	mole %	1.2041	58.7063	1.9512	6.5043	18.9984	7.2199	0.4288	0.8129	0.1673	3.8646	0.0893	0.0395	0.0058	0.0078
ACF_neg_NL7	UCSF-01435	21	Fasn_pos_ mice NORMAL LIVER	4	Mouse Liver	100mg	mole %	1.9472	36.1631	1.8717	6.4922	32.4464	12.703	0.8424	1.1955	0.2968	5.8079	0.1531	0.064	0.0057	0.0109
ACF_neg_NL8	UCSF-01436	22	Fasn_pos_ mice NORMAL LIVER	4	Mouse Liver	100mg	mole %	2.005	27.5258	1.6661	7.7017	36.1318	15.1345	0.8102	1.3635	0.3147	7.0892	0.1707	0.0656	0.0054	0.0157
ACF_neg_NL9	UCSF-01437	23	Fasn_pos_ mice NORMAL LIVER	4	Mouse Liver	100mg	mole %	2.0026	32.3607	1.5602	6.9001	35.49	12.3347	0.8777	1.4541	0.3716	6.3702	0.165	0.091	0.0061	0.016
ACF_neg_NL10	UCSF-01438	24	Fasn_pos_ mice NORMAL LIVER	4	Mouse Liver	100mg	mole %	1.4865	62.9046	2.0104	9.4219	13.7962	6.244	0.3386	0.6316	0.1659	2.8941	0.0678	0.0308	0.0026	0.0049

## Sheet: Species Concentrations
																																					Molecular Species
Complex Lipid Panel: Molecular Species Concentrations																																					CER
																																					CER(18:1)
Project Code:	UCSF-02-16CLP																																				q
								CE	CE	CE	CE	CE	CE	CE	CE	CE	CE	CE	CE	CE	CE	CE	CE	CE	CE	CE	CE	CE	CE	CE	CE	CE	CE	CER	CER	CER	CER	CER	CER	CER	CER	CER	CER	CER	CER	DAG	DAG	DAG	DAG
CLIENT_IDENTIFIER	SAMPLE_NAME	SAMPLE_NUMBER	GROUP_NAME	GROUP_NUMBER	CLIENT_MATRIX	SAMPLE_AMOUNT	QUANTITATIVE_UNITS	CE(12:0)	CE(14:0)	CE(14:1)	CE(15:0)	CE(16:0)	CE(16:1)	CE(17:0)	CE(18:0)	CE(18:1)	CE(18:2)	CE(18:3)	CE(18:4)	CE(20:0)	CE(20:1)	CE(20:2)	CE(20:3)	CE(20:4)	CE(20:5)	CE(22:0)	CE(22:1)	CE(22:2)	CE(22:4)	CE(22:5)	CE(22:6)	CE(24:0)	CE(24:1)	CER(14:0)	CER(16:0)	CER(18:0)	CER(18:1)	CER(20:0)	CER(20:1)	CER(22:0)	CER(22:1)	CER(24:0)	CER(24:1)	CER(26:0)	CER(26:1)	DAG(12:0/16:0)	DAG(12:0/18:1)	DAG(12:0/18:2)	DAG(14:0/14:0)
ACF_pos_T1	UCSF-01415	1	Fasn_neg_ mice injected with PLASMIDS	1	Mouse Liver	100mg	uM	0.35	1.2829	0.4921	0.6646	32.5589	64.2961	4.5249	32.5048	995.058	244.208	16.603	0.4244	6.0396	6.0627	3.7925	14.5399	153.611	6.6497	0.25	0.6447	1.6555	3.008	2.4124	33.112	2.9792	0.5465	0.0503	3.9094	0.4485	0.0495	0.1224	0.0503	0.4262	0.1583	0.5355	1.9456				0.0962
ACF_pos_T2	UCSF-01416	2	Fasn_neg_ mice injected with PLASMIDS	1	Mouse Liver	100mg	uM	0.3251	0.9944	0.439	0.6058	28.892	57.3246	3.7406	27.2756	941.695	225.704	15.7032	0.4405	4.4218	6.1225	4.0233	15.1994	151.794	6.1973		0.6127	1.1292	4.2999	2.7961	29.6477	2.1876	0.7522	0.0479	3.8421	0.4378	0.0533	0.1407	0.045	0.424	0.1656	0.505	1.8295				0.0824
ACF_pos_T3	UCSF-01417	3	Fasn_neg_ mice injected with PLASMIDS	1	Mouse Liver	100mg	uM	0.2539	2.0896	0.3469	1.1479	41.1355	65.7247	4.724	30.1216	1054.92	302.835	22.1311	0.6214	3.2798	5.2432	3.766	14.5362	143.517	5.9882		0.5144	0.6715	2.8077	2.4706	33.1212	1.1248	0.4677	0.0573	3.6317	0.3683	0.0594	0.1659	0.0795	0.5923	0.2019	0.6395	2.5555				0.1394
ACF_pos_T4	UCSF-01418	4	Fasn_neg_ mice injected with PLASMIDS	1	Mouse Liver	100mg	uM	0.2383	1.3036	0.2699	0.693	27.7532	48.9707	3.4134	23.0328	776.119	221.338	15.0398	0.5111	2.5729	4.8949	3.4387	12.8696	134.791	5.3283		0.4688	0.7293	2.5943	1.9929	24.1413	0.8645	0.4182	0.07	4.5333	0.4673	0.0543	0.1561	0.0736	0.6135	0.2274	0.696	2.9587				0.1611	0.1453
ACF_pos_T5	UCSF-01419	5	Fasn_neg_ mice injected with PLASMIDS	1	Mouse Liver	100mg	uM		1.6761	0.4305	0.9726	30.8665	89.7497	4.0189	20.1862	707.548	200.824	15.8267		3.2971	4.4808	2.2093	7.165	70.4152	4.5222		1.0419	0.4407	1.2626	1.7156	23.445	0.9787	0.4129	0.0571	4.4074	0.328	0.0543	0.1667	0.0693	0.673	0.2408	0.6793	2.7285
ACF_pos_T6	UCSF-01420	6	Fasn_neg_ mice injected with PLASMIDS	1	Mouse Liver	100mg	uM	0.1496	1.0822	0.2163	0.4953	26.5564	60.8333	3.1671	15.3685	504.899	134.348	10.1665	0.4001	2.2043	2.8122	1.516	5.1365	43.4452	2.3453		0.3414	0.3267	0.5773	0.8874	15.0554	0.637		0.0352	3.4707	0.3112	0.0459	0.1508	0.044	0.5747	0.1993	0.5365	2.2094				0.1005
ACF_neg_T1	UCSF-01421	7	Fasn_pos_ mice injected with PLASMIDS	2	Mouse Liver	100mg	uM		2.4234	0.418	0.6215	98.5916	105.493	2.3264	16.805	425.515	84.8416	6.7367		1.0575	1.9798	0.9287	5.5656	72.4574	2.121				1.0917	1.6791	21.8032	0.9091		0.0666	4.8733	0.5864	0.0281	0.24	0.0487	1.064	0.2681	0.8246	2.9675				0.2057
ACF_neg_T2	UCSF-01422	8	Fasn_pos_ mice injected with PLASMIDS	2	Mouse Liver	100mg	uM		3.2756		0.7709	120.913	109.844	2.2975	18.8461	476.888	93.5456	7.4355		0.9326	1.5794	1.1778	5.8933	89.4831	2.5214				1.2295	2.3721	23.8279			0.0778	5.9096	0.6912		0.2397	0.0569	1.0564	0.2972	0.8454	3.2219				0.2461
ACF_neg_T3	UCSF-01423	9	Fasn_pos_ mice injected with PLASMIDS	2	Mouse Liver	100mg	uM		4.9399			158.675	123.277	3.3731	21.1788	563.865	74.3629	5.927					6.4808	53.6316							18.8774			0.0747	4.6277	0.6807		0.2924		1.0782	0.2269	0.7437	2.9202				0.2399
ACF_neg_T4	UCSF-01424	10	Fasn_pos_ mice injected with PLASMIDS	2	Mouse Liver	100mg	uM		3.6543			97.0828	103.5	2.1168	14.6616	425.309	57.1021	5.1696					4.0547	43.534	1.7115						18.5265			0.0681	4.777	0.8502		0.3447	0.0575	1.409	0.3073	0.882	3.1842				0.2848
ACF_neg_T5	UCSF-01425	11	Fasn_pos_ mice injected with PLASMIDS	2	Mouse Liver	100mg	uM		2.2603			98.577	84.5094	2.8019	15.9603	353.625	62.9408	6.0504		1.0474	1.3299	0.9402	3.9488	42.545	1.8385					1.5161	18.2714			0.0606	4.2952	0.6712		0.37	0.052	1.936	0.3263	1.2097	3.5903				0.2296
ACF_neg_T6	UCSF-01426	12	Fasn_pos_ mice injected with PLASMIDS	2	Mouse Liver	100mg	uM		2.1168		0.8381	92.0611	89.0551	2.2898	14.9398	342.229	61.1316	5.4697		0.9634	1.1546	0.8856	3.959	45.3299	2.0259					1.5097	15.8669			0.0648	4.184	0.6902		0.3688	0.0398	1.822	0.3202	1.242	3.6427				0.2023
ACF_pos_NL1	UCSF-01427	13	Fasn_neg_ mice NORMAL LIVER	3	Mouse Liver	100mg	uM	1.3508	2.3639			6.325	18.4519	0.6085	2.2726	72.009	60.7313	1.8943		0.6845	0.7518		1.7139	23.5937							4.4718			0.0646	1.5783	0.1592		0.1768		1.4067	0.3262	0.8129	1.3192			0.1446	1.8436	3.7888	0.0876
ACF_pos_NL2	UCSF-01428	14	Fasn_neg_ mice NORMAL LIVER	3	Mouse Liver	100mg	uM	1.4041	1.9806			6.2965	17.0552	0.6347	2.4905	73.8233	59.9759	1.8306		1.4547	0.6022		1.7332	26.9734							3.9229	0.5081		0.0747	1.4204	0.1698		0.2008		1.4027	0.3402	0.7755	1.2481				1.3837	2.2583	0.0667
ACF_pos_NL3	UCSF-01429	15	Fasn_neg_ mice NORMAL LIVER	3	Mouse Liver	100mg	uM	0.4392	1.4605			6.4938	20.6621	0.5635	3.0075	116.594	76.8037	3.1045		0.7219	0.5654		1.4649	20.0485	0.822						4.6295			0.074	1.3665	0.1838		0.2639	0.0331	1.4313	0.4983	0.6093	1.6138				0.6933	1.3207
ACF_pos_NL4	UCSF-01430	16	Fasn_neg_ mice NORMAL LIVER	3	Mouse Liver	100mg	uM	0.3672	1.2451			5.7238	20.3083	0.6884	2.9032	99.2655	67.9126	2.5867		0.8969	0.545	0.3927	1.4889	19.1628	0.6011					0.3762	3.9785			0.0584	1.6826	0.1923		0.289		1.4748	0.4658	0.7287	1.8004				0.6954	1.9439
ACF_pos_NL5	UCSF-01431	17	Fasn_neg_ mice NORMAL LIVER	3	Mouse Liver	100mg	uM	0.4623	1.3043			7.4821	20.9205	0.6603	2.947	83.3792	51.7866	2.0728		0.586	0.5853		1.2465	15.3846							3.6048			0.068	1.6162	0.2366		0.3279		2.0775	0.5431	1.0045	2.0593				1.2589	2.293
ACF_pos_NL6	UCSF-01432	18	Fasn_neg_ mice NORMAL LIVER	3	Mouse Liver	100mg	uM	0.5915	1.2663			7.2153	21.1815	0.5737	2.9099	83.9423	49.7815	2.3406		0.5398	0.5502		1.3057	15.6114	0.4617						3.7947			0.075	1.7354	0.2017		0.3635	0.0262	2.1265	0.5315	0.8803	2.0909				1.2801	1.9345	0.0596
ACF_neg_NL5	UCSF-01433	19	Fasn_pos_ mice NORMAL LIVER	4	Mouse Liver	100mg	uM		0.7292		0.2974	13.4908	17.7567	0.55	1.8375	38.9947	20.2286	1.334					0.8329	7.3688	0.8823					0.4421	7.4066			0.0471	1.5075	0.1627		0.3551		2.9497	0.5785	0.8362	1.5608				0.1297	0.1441
ACF_neg_NL6	UCSF-01434	20	Fasn_pos_ mice NORMAL LIVER	4	Mouse Liver	100mg	uM		0.6077			12.387	17.0549	0.5151	1.8253	35.0284	19.5961	1.4589		0.3093	0.3374		0.6279	6.5122	0.9334					0.5118	7.3224			0.0359	1.4474	0.1303		0.2809		2.9761	0.4618	1.0257	1.4286				0.1491	0.1025
ACF_neg_NL7	UCSF-01435	21	Fasn_pos_ mice NORMAL LIVER	4	Mouse Liver	100mg	uM		0.5679			9.3211	13.5186	0.4539	1.7317	34.7563	24.6694	1.8134		0.3194	0.3285		0.6932	8.9902	0.9753						5.341			0.0408	1.4754	0.162		0.313		3.1883	0.4179	1.024	1.5168				0.1566	0.1602
ACF_neg_NL8	UCSF-01436	22	Fasn_pos_ mice NORMAL LIVER	4	Mouse Liver	100mg	uM		0.5344		0.225	8.7356	12.7811	0.4444	1.6791	35.6963	23.7857	1.9202		0.2563	0.2475		0.8047	8.5222	1.0188					0.2717	5.3518			0.0342	1.2749	0.1355		0.3175		3.3889	0.4212	1.269	1.8664				0.126	0.1428
ACF_neg_NL9	UCSF-01437	23	Fasn_pos_ mice NORMAL LIVER	4	Mouse Liver	100mg	uM		0.6175		0.2005	9.8289	11.7787	0.4706	1.6568	33.8272	22.4941	1.7836		0.3045	0.2976		0.7821	9.2298	0.9132					0.3762	5.0723				1.3224	0.1372		0.2807		3.0496	0.3582	1.2836	1.778
ACF_neg_NL10	UCSF-01438	24	Fasn_pos_ mice NORMAL LIVER	4	Mouse Liver	100mg	uM		1.1584			15.3293	17.6066	0.6297	3.1	59.7564	50.5118	1.6589		0.6665			1.2691	16.0179	0.5929					0.3755	7.7436			0.0605	2.0985	0.3243		0.6031		2.3223	0.3598	0.7802	1.5032				0.6396	1.118
[truncated: 949 more columns]

## Sheet: Species Compositions
Complex Lipid Panel: Molecular Species Compositions (Mole%)
Project Code:	UCSF-02-16CLP
								CE	CE	CE	CE	CE	CE	CE	CE	CE	CE	CE	CE	CE	CE	CE	CE	CE	CE	CE	CE	CE	CE	CE	CE	CE	CE	CER	CER	CER	CER	CER	CER	CER	CER	CER	CER	CER	CER	DAG	DAG	DAG	DAG
CLIENT_IDENTIFIER	SAMPLE_NAME	SAMPLE_NUMBER	GROUP_NAME	GROUP_NUMBER	CLIENT_MATRIX	SAMPLE_AMOUNT	QUANTITATIVE_UNITS	CE(12:0)	CE(14:0)	CE(14:1)	CE(15:0)	CE(16:0)	CE(16:1)	CE(17:0)	CE(18:0)	CE(18:1)	CE(18:2)	CE(18:3)	CE(18:4)	CE(20:0)	CE(20:1)	CE(20:2)	CE(20:3)	CE(20:4)	CE(20:5)	CE(22:0)	CE(22:1)	CE(22:2)	CE(22:4)	CE(22:5)	CE(22:6)	CE(24:0)	CE(24:1)	CER(14:0)	CER(16:0)	CER(18:0)	CER(18:1)	CER(20:0)	CER(20:1)	CER(22:0)	CER(22:1)	CER(24:0)	CER(24:1)	CER(26:0)	CER(26:1)	DAG(12:0/16:0)	DAG(12:0/18:1)	DAG(12:0/18:2)	DAG(14:0/14:0)
ACF_pos_T1	UCSF-01415	1	Fasn_neg_ mice injected with PLASMIDS	1	Mouse Liver	100mg	mole %	0.0215	0.0788	0.0302	0.0408	1.9996	3.9487	0.2779	1.9963	61.1113	14.998	1.0197	0.0261	0.3709	0.3723	0.2329	0.893	9.434	0.4084	0.0154	0.0396	0.1017	0.1847	0.1482	2.0336	0.183	0.0336	0.6535	50.7981	5.8275	0.6427	1.5908	0.6535	5.5383	2.0568	6.9577	25.2812				0.0629
ACF_pos_T2	UCSF-01416	2	Fasn_neg_ mice injected with PLASMIDS	1	Mouse Liver	100mg	mole %	0.0212	0.0649	0.0286	0.0395	1.8855	3.741	0.2441	1.78	61.4554	14.7295	1.0248	0.0288	0.2886	0.3996	0.2626	0.9919	9.9061	0.4044		0.04	0.0737	0.2806	0.1825	1.9348	0.1428	0.0491	0.6398	51.289	5.8448	0.7122	1.8787	0.601	5.6606	2.2102	6.7411	24.4227				0.0568
ACF_pos_T3	UCSF-01417	3	Fasn_neg_ mice injected with PLASMIDS	1	Mouse Liver	100mg	mole %	0.0146	0.1198	0.0199	0.0658	2.3593	3.7696	0.2709	1.7276	60.5039	17.3687	1.2693	0.0356	0.1881	0.3007	0.216	0.8337	8.2312	0.3434		0.0295	0.0385	0.161	0.1417	1.8996	0.0645	0.0268	0.6863	43.4866	4.4102	0.7108	1.9867	0.9518	7.0919	2.4173	7.6578	30.6006				0.1211
ACF_pos_T4	UCSF-01418	4	Fasn_neg_ mice injected with PLASMIDS	1	Mouse Liver	100mg	mole %	0.0181	0.0992	0.0205	0.0527	2.1125	3.7274	0.2598	1.7532	59.0749	16.8473	1.1448	0.0389	0.1958	0.3726	0.2617	0.9796	10.2597	0.4056		0.0357	0.0555	0.1975	0.1517	1.8375	0.0658	0.0318	0.7103	46.0229	4.7443	0.5509	1.5845	0.7467	6.2287	2.3084	7.0664	30.0369				0.1039	0.0937
ACF_pos_T5	UCSF-01419	5	Fasn_neg_ mice injected with PLASMIDS	1	Mouse Liver	100mg	mole %		0.1404	0.0361	0.0815	2.5862	7.52	0.3367	1.6914	59.2841	16.8267	1.3261		0.2763	0.3754	0.1851	0.6003	5.9	0.3789		0.0873	0.0369	0.1058	0.1437	1.9644	0.082	0.0346	0.6074	46.8651	3.4881	0.5771	1.7724	0.7368	7.1565	2.5607	7.2235	29.0125
ACF_pos_T6	UCSF-01420	6	Fasn_neg_ mice injected with PLASMIDS	1	Mouse Liver	100mg	mole %	0.018	0.1299	0.026	0.0595	3.1882	7.3032	0.3802	1.845	60.6145	16.1289	1.2205	0.048	0.2646	0.3376	0.182	0.6167	5.2157	0.2816		0.041	0.0392	0.0693	0.1065	1.8074	0.0765		0.4639	45.8019	4.1066	0.6053	1.9903	0.5811	7.5836	2.6296	7.08	29.1577				0.0534
ACF_neg_T1	UCSF-01421	7	Fasn_pos_ mice injected with PLASMIDS	2	Mouse Liver	100mg	mole %		0.284	0.049	0.0728	11.5533	12.362	0.2726	1.9693	49.8632	9.942	0.7894		0.1239	0.232	0.1088	0.6522	8.4908	0.2485				0.1279	0.1968	2.555	0.1065		0.6075	44.4351	5.3465	0.2558	2.1879	0.4444	9.7013	2.445	7.5187	27.0577				0.0593
ACF_neg_T2	UCSF-01422	8	Fasn_pos_ mice injected with PLASMIDS	2	Mouse Liver	100mg	mole %		0.3402		0.0801	12.558	11.4084	0.2386	1.9574	49.5297	9.7157	0.7723		0.0969	0.164	0.1223	0.6121	9.2937	0.2619				0.1277	0.2464	2.4748			0.6277	47.6724	5.5759		1.934	0.4591	8.5222	2.3978	6.82	25.9908				0.0739
ACF_neg_T3	UCSF-01423	9	Fasn_pos_ mice injected with PLASMIDS	2	Mouse Liver	100mg	mole %		0.4775			15.337	11.9155	0.326	2.0471	54.5014	7.1877	0.5729					0.6264	5.1839							1.8246			0.7017	43.4756	6.3946		2.7473		10.1288	2.1315	6.9867	27.4337				0.0465
ACF_neg_T4	UCSF-01424	10	Fasn_pos_ mice injected with PLASMIDS	2	Mouse Liver	100mg	mole %		0.4707			12.5039	13.3304	0.2726	1.8883	54.778	7.3545	0.6658					0.5222	5.607	0.2204						2.3861			0.5733	40.211	7.1564		2.9014	0.4839	11.8603	2.5865	7.4244	26.8029				0.0643
ACF_neg_T5	UCSF-01425	11	Fasn_pos_ mice injected with PLASMIDS	2	Mouse Liver	100mg	mole %		0.3237			14.1195	12.1045	0.4013	2.286	50.6508	9.0152	0.8666		0.15	0.1905	0.1347	0.5656	6.0939	0.2633					0.2172	2.6171			0.484	34.3307	5.3645		2.9574	0.4155	15.4746	2.6078	9.6688	28.6968				0.0729
ACF_neg_T6	UCSF-01426	12	Fasn_pos_ mice injected with PLASMIDS	2	Mouse Liver	100mg	mole %		0.3105		0.1229	13.5021	13.0613	0.3358	2.1911	50.193	8.9659	0.8022		0.1413	0.1693	0.1299	0.5806	6.6483	0.2971					0.2214	2.3271			0.5238	33.8111	5.578		2.9805	0.322	14.7236	2.5875	10.0363	29.4373				0.0699
ACF_pos_NL1	UCSF-01427	13	Fasn_neg_ mice NORMAL LIVER	3	Mouse Liver	100mg	mole %	0.6849	1.1986			3.207	9.3559	0.3085	1.1523	36.5115	30.7932	0.9605		0.3471	0.3812		0.869	11.963							2.2674			1.1047	27.007	2.7241		3.0256		24.0707	5.5823	13.911	22.5747			0.0592	0.7554	1.5524	0.0359
ACF_pos_NL2	UCSF-01428	14	Fasn_neg_ mice NORMAL LIVER	3	Mouse Liver	100mg	mole %	0.6997	0.9869			3.1375	8.4985	0.3163	1.241	36.7855	29.8855	0.9122		0.7249	0.3001		0.8636	13.4406							1.9547	0.2532		1.3262	25.2196	3.0147		3.5658		24.9047	6.0406	13.7684	22.16				0.7821	1.2765	0.0377
ACF_pos_NL3	UCSF-01429	15	Fasn_neg_ mice NORMAL LIVER	3	Mouse Liver	100mg	mole %	0.1706	0.5675			2.523	8.0278	0.2189	1.1685	45.3002	29.8404	1.2062		0.2805	0.2197		0.5692	7.7894	0.3194						1.7987			1.2183	22.498	3.0255		4.3453	0.5457	23.5641	8.2033	10.0307	26.5692				0.3491	0.665
ACF_pos_NL4	UCSF-01430	16	Fasn_neg_ mice NORMAL LIVER	3	Mouse Liver	100mg	mole %	0.1607	0.545			2.5056	8.8899	0.3014	1.2709	43.4531	29.7285	1.1323		0.3926	0.2386	0.1719	0.6517	8.3884	0.2631					0.1647	1.7416			0.8723	25.1434	2.873		4.3188		22.0387	6.9601	10.8896	26.9042				0.2901	0.811
ACF_pos_NL5	UCSF-01431	17	Fasn_neg_ mice NORMAL LIVER	3	Mouse Liver	100mg	mole %	0.2402	0.6778			3.8884	10.8722	0.3432	1.5315	43.3314	26.913	1.0772		0.3045	0.3042		0.6478	7.9952							1.8734			0.8568	20.3729	2.9829		4.1333		26.188	6.8465	12.6616	25.958				0.6224	1.1336
ACF_pos_NL6	UCSF-01432	18	Fasn_neg_ mice NORMAL LIVER	3	Mouse Liver	100mg	mole %	0.308	0.6593			3.7567	11.0282	0.2987	1.515	43.7049	25.9189	1.2186		0.2811	0.2864		0.6798	8.1281	0.2404						1.9757			0.9339	21.609	2.5113		4.5264	0.3257	26.4789	6.6178	10.961	26.0361				0.6079	0.9187	0.0283
ACF_neg_NL5	UCSF-01433	19	Fasn_pos_ mice NORMAL LIVER	4	Mouse Liver	100mg	mole %		0.6502		0.2652	12.0291	15.8327	0.4904	1.6384	34.7696	18.0368	1.1895					0.7427	6.5704	0.7867					0.3942	6.6041			0.5888	18.8495	2.0339		4.4402		36.8826	7.2333	10.456	19.5156				0.0692	0.0768
ACF_neg_NL6	UCSF-01434	20	Fasn_pos_ mice NORMAL LIVER	4	Mouse Liver	100mg	mole %		0.5786			11.794	16.2384	0.4904	1.738	33.3516	18.6581	1.389		0.2945	0.3213		0.5979	6.2004	0.8887					0.4873	6.9719			0.4611	18.5878	1.6734		3.6078		38.2198	5.9304	13.1728	18.3469				0.0876	0.0602
ACF_neg_NL7	UCSF-01435	21	Fasn_pos_ mice NORMAL LIVER	4	Mouse Liver	100mg	mole %		0.5488			9.0077	13.064	0.4386	1.6735	33.5875	23.8398	1.7524		0.3086	0.3175		0.6699	8.6879	0.9425						5.1614			0.5011	18.1294	1.9908		3.8462		39.1772	5.1347	12.5823	18.6383				0.1574	0.1611
ACF_neg_NL8	UCSF-01436	22	Fasn_pos_ mice NORMAL LIVER	4	Mouse Liver	100mg	mole %		0.5225		0.22	8.5413	12.4968	0.4345	1.6417	34.9024	23.2567	1.8775		0.2506	0.242		0.7868	8.3327	0.9961					0.2656	5.2327			0.3933	14.6413	1.5563		3.6463		38.9179	4.8374	14.5739	21.4338				0.1482	0.168
ACF_neg_NL9	UCSF-01437	23	Fasn_pos_ mice NORMAL LIVER	4	Mouse Liver	100mg	mole %		0.6197		0.2012	9.8651	11.822	0.4723	1.6629	33.9516	22.5768	1.7901		0.3057	0.2987		0.785	9.2638	0.9166					0.3776	5.0909				16.1074	1.6713		3.4192		37.146	4.3634	15.6354	21.6573
ACF_neg_NL10	UCSF-01438	24	Fasn_pos_ mice NORMAL LIVER	4	Mouse Liver	100mg	mole %		0.6566			8.6893	9.9801	0.3569	1.7572	33.8723	28.6322	0.9403		0.3778			0.7194	9.0796	0.3361					0.2128	4.3894			0.7517	26.0621	4.0276		7.4897		28.8414	4.469	9.6897	18.669				0.2681	0.4686
[truncated: 949 more columns]

## Sheet: Fatty Acid Concentrations
Complex Lipid Panel: Fatty Acid Concentrations
Project Code:	UCSF-02-16CLP
								CE	CE	CE	CE	CE	CE	CE	CE	CE	CE	CE	CE	CE	CE	CE	CE	CE	CE	CE	CE	CE	CE	CE	CE	CE	CE	CER	CER	CER	CER	CER	CER	CER	CER	CER	CER	CER	CER	DAG	DAG	DAG	DAG
CLIENT_IDENTIFIER	SAMPLE_NAME	SAMPLE_NUMBER	GROUP_NAME	GROUP_NUMBER	CLIENT_MATRIX	SAMPLE_AMOUNT	QUANTITATIVE_UNITS	CE[FA12:0]	CE[FA14:0]	CE[FA14:1]	CE[FA15:0]	CE[FA16:0]	CE[FA16:1]	CE[FA17:0]	CE[FA18:0]	CE[FA18:1]	CE[FA18:2]	CE[FA18:3]	CE[FA18:4]	CE[FA20:0]	CE[FA20:1]	CE[FA20:2]	CE[FA20:3]	CE[FA20:4]	CE[FA20:5]	CE[FA22:0]	CE[FA22:1]	CE[FA22:2]	CE[FA22:4]	CE[FA22:5]	CE[FA22:6]	CE[FA24:0]	CE[FA24:1]	CER[FA14:0]	CER[FA16:0]	CER[FA18:0]	CER[FA18:1]	CER[FA20:0]	CER[FA20:1]	CER[FA22:0]	CER[FA22:1]	CER[FA24:0]	CER[FA24:1]	CER[FA26:0]	CER[FA26:1]	DAG[FA12:0]	DAG[FA14:0]	DAG[FA14:1]	DAG[FA15:0]
ACF_pos_T1	UCSF-01415	1	Fasn_neg_ mice injected with PLASMIDS	1	Mouse Liver	100mg	uM	0.35	1.2829	0.4921	0.6646	32.5589	64.2961	4.5249	32.5048	995.058	244.208	16.603	0.4244	6.0396	6.0627	3.7925	14.5399	153.611	6.6497	0.25	0.6447	1.6555	3.008	2.4124	33.112	2.9792	0.5465	0.0503	3.9094	0.4485	0.0495	0.1224	0.0503	0.4262	0.1583	0.5355	1.9456			0.0962	1.2509	0.0979	0.3176
ACF_pos_T2	UCSF-01416	2	Fasn_neg_ mice injected with PLASMIDS	1	Mouse Liver	100mg	uM	0.3251	0.9944	0.439	0.6058	28.892	57.3246	3.7406	27.2756	941.695	225.704	15.7032	0.4405	4.4218	6.1225	4.0233	15.1994	151.794	6.1973		0.6127	1.1292	4.2999	2.7961	29.6477	2.1876	0.7522	0.0479	3.8421	0.4378	0.0533	0.1407	0.045	0.424	0.1656	0.505	1.8295			0.0824	1.137	0.0971	0.3774
ACF_pos_T3	UCSF-01417	3	Fasn_neg_ mice injected with PLASMIDS	1	Mouse Liver	100mg	uM	0.2539	2.0896	0.3469	1.1479	41.1355	65.7247	4.724	30.1216	1054.92	302.835	22.1311	0.6214	3.2798	5.2432	3.766	14.5362	143.517	5.9882		0.5144	0.6715	2.8077	2.4706	33.1212	1.1248	0.4677	0.0573	3.6317	0.3683	0.0594	0.1659	0.0795	0.5923	0.2019	0.6395	2.5555			0.1394	1.4841	0.1166	0.3473
ACF_pos_T4	UCSF-01418	4	Fasn_neg_ mice injected with PLASMIDS	1	Mouse Liver	100mg	uM	0.2383	1.3036	0.2699	0.693	27.7532	48.9707	3.4134	23.0328	776.119	221.338	15.0398	0.5111	2.5729	4.8949	3.4387	12.8696	134.791	5.3283		0.4688	0.7293	2.5943	1.9929	24.1413	0.8645	0.4182	0.07	4.5333	0.4673	0.0543	0.1561	0.0736	0.6135	0.2274	0.696	2.9587			0.3064	1.3091	0.0919	0.3549
ACF_pos_T5	UCSF-01419	5	Fasn_neg_ mice injected with PLASMIDS	1	Mouse Liver	100mg	uM		1.6761	0.4305	0.9726	30.8665	89.7497	4.0189	20.1862	707.548	200.824	15.8267		3.2971	4.4808	2.2093	7.165	70.4152	4.5222		1.0419	0.4407	1.2626	1.7156	23.445	0.9787	0.4129	0.0571	4.4074	0.328	0.0543	0.1667	0.0693	0.673	0.2408	0.6793	2.7285				1.9687	0.1279	0.5043
ACF_pos_T6	UCSF-01420	6	Fasn_neg_ mice injected with PLASMIDS	1	Mouse Liver	100mg	uM	0.1496	1.0822	0.2163	0.4953	26.5564	60.8333	3.1671	15.3685	504.899	134.348	10.1665	0.4001	2.2043	2.8122	1.516	5.1365	43.4452	2.3453		0.3414	0.3267	0.5773	0.8874	15.0554	0.637		0.0352	3.4707	0.3112	0.0459	0.1508	0.044	0.5747	0.1993	0.5365	2.2094			0.1005	1.6916	0.111	0.4355
ACF_neg_T1	UCSF-01421	7	Fasn_pos_ mice injected with PLASMIDS	2	Mouse Liver	100mg	uM		2.4234	0.418	0.6215	98.5916	105.493	2.3264	16.805	425.515	84.8416	6.7367		1.0575	1.9798	0.9287	5.5656	72.4574	2.121				1.0917	1.6791	21.8032	0.9091		0.0666	4.8733	0.5864	0.0281	0.24	0.0487	1.064	0.2681	0.8246	2.9675			0.2057	7.6329	0.4281	0.572
ACF_neg_T2	UCSF-01422	8	Fasn_pos_ mice injected with PLASMIDS	2	Mouse Liver	100mg	uM		3.2756		0.7709	120.913	109.844	2.2975	18.8461	476.888	93.5456	7.4355		0.9326	1.5794	1.1778	5.8933	89.4831	2.5214				1.2295	2.3721	23.8279			0.0778	5.9096	0.6912		0.2397	0.0569	1.0564	0.2972	0.8454	3.2219			0.2461	7.0395	0.5147	0.3238
ACF_neg_T3	UCSF-01423	9	Fasn_pos_ mice injected with PLASMIDS	2	Mouse Liver	100mg	uM		4.9399			158.675	123.277	3.3731	21.1788	563.865	74.3629	5.927					6.4808	53.6316							18.8774			0.0747	4.6277	0.6807		0.2924		1.0782	0.2269	0.7437	2.9202			0.2399	9.8029	0.7032	0.5205
ACF_neg_T4	UCSF-01424	10	Fasn_pos_ mice injected with PLASMIDS	2	Mouse Liver	100mg	uM		3.6543			97.0828	103.5	2.1168	14.6616	425.309	57.1021	5.1696					4.0547	43.534	1.7115						18.5265			0.0681	4.777	0.8502		0.3447	0.0575	1.409	0.3073	0.882	3.1842			0.2848	10.1003	0.6006	0.5507
ACF_neg_T5	UCSF-01425	11	Fasn_pos_ mice injected with PLASMIDS	2	Mouse Liver	100mg	uM		2.2603			98.577	84.5094	2.8019	15.9603	353.625	62.9408	6.0504		1.0474	1.3299	0.9402	3.9488	42.545	1.8385					1.5161	18.2714			0.0606	4.2952	0.6712		0.37	0.052	1.936	0.3263	1.2097	3.5903			0.2296	7.5406	0.4875	0.7187
ACF_neg_T6	UCSF-01426	12	Fasn_pos_ mice injected with PLASMIDS	2	Mouse Liver	100mg	uM		2.1168		0.8381	92.0611	89.0551	2.2898	14.9398	342.229	61.1316	5.4697		0.9634	1.1546	0.8856	3.959	45.3299	2.0259					1.5097	15.8669			0.0648	4.184	0.6902		0.3688	0.0398	1.822	0.3202	1.242	3.6427			0.2023	6.2803	0.4042	0.6458
ACF_pos_NL1	UCSF-01427	13	Fasn_neg_ mice NORMAL LIVER	3	Mouse Liver	100mg	uM	1.3508	2.3639			6.325	18.4519	0.6085	2.2726	72.009	60.7313	1.8943		0.6845	0.7518		1.7139	23.5937							4.4718			0.0646	1.5783	0.1592		0.1768		1.4067	0.3262	0.8129	1.3192			5.777	17.5646	0.2488	0.8348
ACF_pos_NL2	UCSF-01428	14	Fasn_neg_ mice NORMAL LIVER	3	Mouse Liver	100mg	uM	1.4041	1.9806			6.2965	17.0552	0.6347	2.4905	73.8233	59.9759	1.8306		1.4547	0.6022		1.7332	26.9734							3.9229	0.5081		0.0747	1.4204	0.1698		0.2008		1.4027	0.3402	0.7755	1.2481			3.642	12.1393	0.4039	0.5066
ACF_pos_NL3	UCSF-01429	15	Fasn_neg_ mice NORMAL LIVER	3	Mouse Liver	100mg	uM	0.4392	1.4605			6.4938	20.6621	0.5635	3.0075	116.594	76.8037	3.1045		0.7219	0.5654		1.4649	20.0485	0.822						4.6295			0.074	1.3665	0.1838		0.2639	0.0331	1.4313	0.4983	0.6093	1.6138			2.014	7.1365	0.1731	0.5693
ACF_pos_NL4	UCSF-01430	16	Fasn_neg_ mice NORMAL LIVER	3	Mouse Liver	100mg	uM	0.3672	1.2451			5.7238	20.3083	0.6884	2.9032	99.2655	67.9126	2.5867		0.8969	0.545	0.3927	1.4889	19.1628	0.6011					0.3762	3.9785			0.0584	1.6826	0.1923		0.289		1.4748	0.4658	0.7287	1.8004			2.6393	8.4345	0.2297	0.6779
ACF_pos_NL5	UCSF-01431	17	Fasn_neg_ mice NORMAL LIVER	3	Mouse Liver	100mg	uM	0.4623	1.3043			7.4821	20.9205	0.6603	2.947	83.3792	51.7866	2.0728		0.586	0.5853		1.2465	15.3846							3.6048			0.068	1.6162	0.2366		0.3279		2.0775	0.5431	1.0045	2.0593			3.5519	9.6204	0.215	0.6021
ACF_pos_NL6	UCSF-01432	18	Fasn_neg_ mice NORMAL LIVER	3	Mouse Liver	100mg	uM	0.5915	1.2663			7.2153	21.1815	0.5737	2.9099	83.9423	49.7815	2.3406		0.5398	0.5502		1.3057	15.6114	0.4617						3.7947			0.075	1.7354	0.2017		0.3635	0.0262	2.1265	0.5315	0.8803	2.0909			3.2146	10.3211	0.3401	0.5692
ACF_neg_NL5	UCSF-01433	19	Fasn_pos_ mice NORMAL LIVER	4	Mouse Liver	100mg	uM		0.7292		0.2974	13.4908	17.7567	0.55	1.8375	38.9947	20.2286	1.334					0.8329	7.3688	0.8823					0.4421	7.4066			0.0471	1.5075	0.1627		0.3551		2.9497	0.5785	0.8362	1.5608			0.2738	5.2455	0.2681	0.6188
ACF_neg_NL6	UCSF-01434	20	Fasn_pos_ mice NORMAL LIVER	4	Mouse Liver	100mg	uM		0.6077			12.387	17.0549	0.5151	1.8253	35.0284	19.5961	1.4589		0.3093	0.3374		0.6279	6.5122	0.9334					0.5118	7.3224			0.0359	1.4474	0.1303		0.2809		2.9761	0.4618	1.0257	1.4286			0.2516	4.9802	0.2078	0.7248
ACF_neg_NL7	UCSF-01435	21	Fasn_pos_ mice NORMAL LIVER	4	Mouse Liver	100mg	uM		0.5679			9.3211	13.5186	0.4539	1.7317	34.7563	24.6694	1.8134		0.3194	0.3285		0.6932	8.9902	0.9753						5.341			0.0408	1.4754	0.162		0.313		3.1883	0.4179	1.024	1.5168			0.3168	3.0946	0.1047	0.508
ACF_neg_NL8	UCSF-01436	22	Fasn_pos_ mice NORMAL LIVER	4	Mouse Liver	100mg	uM		0.5344		0.225	8.7356	12.7811	0.4444	1.6791	35.6963	23.7857	1.9202		0.2563	0.2475		0.8047	8.5222	1.0188					0.2717	5.3518			0.0342	1.2749	0.1355		0.3175		3.3889	0.4212	1.269	1.8664			0.2688	2.9721	0.1008	0.4247
ACF_neg_NL9	UCSF-01437	23	Fasn_pos_ mice NORMAL LIVER	4	Mouse Liver	100mg	uM		0.6175		0.2005	9.8289	11.7787	0.4706	1.6568	33.8272	22.4941	1.7836		0.3045	0.2976		0.7821	9.2298	0.9132					0.3762	5.0723				1.3224	0.1372		0.2807		3.0496	0.3582	1.2836	1.778				2.7522	0.1115	0.4283
ACF_neg_NL10	UCSF-01438	24	Fasn_pos_ mice NORMAL LIVER	4	Mouse Liver	100mg	uM		1.1584			15.3293	17.6066	0.6297	3.1	59.7564	50.5118	1.6589		0.6665			1.2691	16.0179	0.5929					0.3755	7.7436			0.0605	2.0985	0.3243		0.6031		2.3223	0.3598	0.7802	1.5032			1.7576	8.9797	0.2989	0.5997
[truncated: 218 more columns]

## Sheet: Fatty Acid Compositions
Complex Lipid Panel: Fatty Acid Compositions (Mole%)
Project Code:	UCSF-02-16CLP
								CE	CE	CE	CE	CE	CE	CE	CE	CE	CE	CE	CE	CE	CE	CE	CE	CE	CE	CE	CE	CE	CE	CE	CE	CE	CE	CER	CER	CER	CER	CER	CER	CER	CER	CER	CER	CER	CER	DAG	DAG	DAG	DAG
CLIENT_IDENTIFIER	SAMPLE_NAME	SAMPLE_NUMBER	GROUP_NAME	GROUP_NUMBER	CLIENT_MATRIX	SAMPLE_AMOUNT	QUANTITATIVE_UNITS	CE[FA12:0]	CE[FA14:0]	CE[FA14:1]	CE[FA15:0]	CE[FA16:0]	CE[FA16:1]	CE[FA17:0]	CE[FA18:0]	CE[FA18:1]	CE[FA18:2]	CE[FA18:3]	CE[FA18:4]	CE[FA20:0]	CE[FA20:1]	CE[FA20:2]	CE[FA20:3]	CE[FA20:4]	CE[FA20:5]	CE[FA22:0]	CE[FA22:1]	CE[FA22:2]	CE[FA22:4]	CE[FA22:5]	CE[FA22:6]	CE[FA24:0]	CE[FA24:1]	CER[FA14:0]	CER[FA16:0]	CER[FA18:0]	CER[FA18:1]	CER[FA20:0]	CER[FA20:1]	CER[FA22:0]	CER[FA22:1]	CER[FA24:0]	CER[FA24:1]	CER[FA26:0]	CER[FA26:1]	DAG[FA12:0]	DAG[FA14:0]	DAG[FA14:1]	DAG[FA15:0]
ACF_pos_T1	UCSF-01415	1	Fasn_neg_ mice injected with PLASMIDS	1	Mouse Liver	100mg	mole %	0.0215	0.0788	0.0302	0.0408	1.9996	3.9487	0.2779	1.9963	61.1113	14.998	1.0197	0.0261	0.3709	0.3723	0.2329	0.893	9.434	0.4084	0.0154	0.0396	0.1017	0.1847	0.1482	2.0336	0.183	0.0336	0.6535	50.7981	5.8275	0.6427	1.5908	0.6535	5.5383	2.0568	6.9577	25.2812			0.0314	0.409	0.032	0.1039
ACF_pos_T2	UCSF-01416	2	Fasn_neg_ mice injected with PLASMIDS	1	Mouse Liver	100mg	mole %	0.0212	0.0649	0.0286	0.0395	1.8855	3.741	0.2441	1.78	61.4554	14.7295	1.0248	0.0288	0.2886	0.3996	0.2626	0.9919	9.9061	0.4044		0.04	0.0737	0.2806	0.1825	1.9348	0.1428	0.0491	0.6398	51.289	5.8448	0.7122	1.8787	0.601	5.6606	2.2102	6.7411	24.4227			0.0284	0.3921	0.0335	0.1302
ACF_pos_T3	UCSF-01417	3	Fasn_neg_ mice injected with PLASMIDS	1	Mouse Liver	100mg	mole %	0.0146	0.1198	0.0199	0.0658	2.3593	3.7696	0.2709	1.7276	60.5039	17.3687	1.2693	0.0356	0.1881	0.3007	0.216	0.8337	8.2312	0.3434		0.0295	0.0385	0.161	0.1417	1.8996	0.0645	0.0268	0.6863	43.4866	4.4102	0.7108	1.9867	0.9518	7.0919	2.4173	7.6578	30.6006			0.0605	0.6443	0.0506	0.1508
ACF_pos_T4	UCSF-01418	4	Fasn_neg_ mice injected with PLASMIDS	1	Mouse Liver	100mg	mole %	0.0181	0.0992	0.0205	0.0527	2.1125	3.7274	0.2598	1.7532	59.0749	16.8473	1.1448	0.0389	0.1958	0.3726	0.2617	0.9796	10.2597	0.4056		0.0357	0.0555	0.1975	0.1517	1.8375	0.0658	0.0318	0.7103	46.0229	4.7443	0.5509	1.5845	0.7467	6.2287	2.3084	7.0664	30.0369			0.0988	0.422	0.0296	0.1144
ACF_pos_T5	UCSF-01419	5	Fasn_neg_ mice injected with PLASMIDS	1	Mouse Liver	100mg	mole %		0.1404	0.0361	0.0815	2.5862	7.52	0.3367	1.6914	59.2842	16.8267	1.3261		0.2763	0.3754	0.1851	0.6003	5.9	0.3789		0.0873	0.0369	0.1058	0.1437	1.9644	0.082	0.0346	0.6074	46.8651	3.4881	0.5771	1.7724	0.7368	7.1565	2.5607	7.2235	29.0125				0.4507	0.0293	0.1155
ACF_pos_T6	UCSF-01420	6	Fasn_neg_ mice injected with PLASMIDS	1	Mouse Liver	100mg	mole %	0.018	0.1299	0.026	0.0595	3.1882	7.3032	0.3802	1.845	60.6145	16.1289	1.2205	0.048	0.2646	0.3376	0.182	0.6167	5.2157	0.2816		0.041	0.0392	0.0693	0.1065	1.8074	0.0765		0.4639	45.8019	4.1066	0.6053	1.9903	0.5811	7.5836	2.6296	7.08	29.1577			0.0267	0.4496	0.0295	0.1158
ACF_neg_T1	UCSF-01421	7	Fasn_pos_ mice injected with PLASMIDS	2	Mouse Liver	100mg	mole %		0.284	0.049	0.0728	11.5533	12.362	0.2726	1.9693	49.8632	9.942	0.7894		0.1239	0.232	0.1088	0.6522	8.4908	0.2485				0.1279	0.1968	2.555	0.1065		0.6075	44.4351	5.3465	0.2558	2.1879	0.4444	9.7013	2.445	7.5187	27.0577			0.0297	1.1014	0.0618	0.0825
ACF_neg_T2	UCSF-01422	8	Fasn_pos_ mice injected with PLASMIDS	2	Mouse Liver	100mg	mole %		0.3402		0.0801	12.558	11.4084	0.2386	1.9574	49.5297	9.7157	0.7723		0.0969	0.164	0.1223	0.6121	9.2937	0.2619				0.1277	0.2464	2.4748			0.6277	47.6724	5.5759		1.934	0.4591	8.5222	2.3978	6.82	25.9908			0.0369	1.0567	0.0773	0.0486
ACF_neg_T3	UCSF-01423	9	Fasn_pos_ mice injected with PLASMIDS	2	Mouse Liver	100mg	mole %		0.4775			15.337	11.9155	0.326	2.0471	54.5014	7.1877	0.5729					0.6264	5.1839							1.8246			0.7017	43.4756	6.3946		2.7473		10.1288	2.1315	6.9867	27.4337			0.0233	0.9503	0.0682	0.0505
ACF_neg_T4	UCSF-01424	10	Fasn_pos_ mice injected with PLASMIDS	2	Mouse Liver	100mg	mole %		0.4707			12.5039	13.3304	0.2726	1.8883	54.778	7.3545	0.6658					0.5222	5.607	0.2204						2.3861			0.5733	40.211	7.1564		2.9014	0.4839	11.8603	2.5865	7.4244	26.8029			0.0321	1.1394	0.0678	0.0621
ACF_neg_T5	UCSF-01425	11	Fasn_pos_ mice injected with PLASMIDS	2	Mouse Liver	100mg	mole %		0.3237			14.1195	12.1045	0.4013	2.286	50.6508	9.0152	0.8666		0.15	0.1905	0.1347	0.5656	6.0939	0.2633					0.2172	2.6171			0.484	34.3307	5.3645		2.9574	0.4155	15.4746	2.6078	9.6688	28.6968			0.0364	1.1966	0.0774	0.1141
ACF_neg_T6	UCSF-01426	12	Fasn_pos_ mice injected with PLASMIDS	2	Mouse Liver	100mg	mole %		0.3105		0.1229	13.5021	13.0613	0.3358	2.1911	50.193	8.9659	0.8022		0.1413	0.1693	0.1299	0.5806	6.6483	0.2971					0.2214	2.3271			0.5238	33.8111	5.578		2.9805	0.322	14.7236	2.5875	10.0363	29.4373			0.035	1.0853	0.0698	0.1116
ACF_pos_NL1	UCSF-01427	13	Fasn_neg_ mice NORMAL LIVER	3	Mouse Liver	100mg	mole %	0.6849	1.1986			3.207	9.3559	0.3085	1.1523	36.5115	30.7932	0.9605		0.3471	0.3812		0.869	11.963							2.2674			1.1047	27.007	2.7241		3.0256		24.0707	5.5823	13.911	22.5747			1.1835	3.5984	0.051	0.171
ACF_pos_NL2	UCSF-01428	14	Fasn_neg_ mice NORMAL LIVER	3	Mouse Liver	100mg	mole %	0.6997	0.9869			3.1375	8.4985	0.3163	1.241	36.7855	29.8855	0.9122		0.7249	0.3001		0.8636	13.4406							1.9547	0.2532		1.3262	25.2196	3.0147		3.5658		24.9047	6.0406	13.7684	22.16			1.0293	3.4309	0.1141	0.1432
ACF_pos_NL3	UCSF-01429	15	Fasn_neg_ mice NORMAL LIVER	3	Mouse Liver	100mg	mole %	0.1706	0.5675			2.523	8.0278	0.2189	1.1685	45.3002	29.8404	1.2062		0.2805	0.2197		0.5692	7.7894	0.3194						1.7987			1.2183	22.498	3.0255		4.3453	0.5457	23.564	8.2033	10.0307	26.5692			0.507	1.7967	0.0436	0.1433
ACF_pos_NL4	UCSF-01430	16	Fasn_neg_ mice NORMAL LIVER	3	Mouse Liver	100mg	mole %	0.1607	0.545			2.5056	8.8899	0.3014	1.2709	43.4531	29.7285	1.1323		0.3926	0.2386	0.1719	0.6517	8.3884	0.2631					0.1647	1.7416			0.8723	25.1434	2.873		4.3188		22.0387	6.9601	10.8896	26.9042			0.5506	1.7594	0.0479	0.1414
ACF_pos_NL5	UCSF-01431	17	Fasn_neg_ mice NORMAL LIVER	3	Mouse Liver	100mg	mole %	0.2402	0.6778			3.8884	10.8722	0.3432	1.5315	43.3314	26.913	1.0772		0.3045	0.3042		0.6478	7.9952							1.8734			0.8568	20.3729	2.9829		4.1333		26.188	6.8465	12.6616	25.958			0.878	2.378	0.0532	0.1488
ACF_pos_NL6	UCSF-01432	18	Fasn_neg_ mice NORMAL LIVER	3	Mouse Liver	100mg	mole %	0.308	0.6593			3.7567	11.0282	0.2987	1.515	43.7049	25.9189	1.2186		0.2811	0.2864		0.6798	8.1281	0.2404						1.9757			0.9339	21.609	2.5113		4.5264	0.3257	26.4789	6.6178	10.961	26.0361			0.7633	2.4507	0.0808	0.1352
ACF_neg_NL5	UCSF-01433	19	Fasn_pos_ mice NORMAL LIVER	4	Mouse Liver	100mg	mole %		0.6502		0.2652	12.0291	15.8327	0.4904	1.6384	34.7696	18.0368	1.1895					0.7427	6.5704	0.7867					0.3942	6.6041			0.5888	18.8495	2.0339		4.4402		36.8826	7.2333	10.456	19.5156			0.073	1.3983	0.0715	0.165
ACF_neg_NL6	UCSF-01434	20	Fasn_pos_ mice NORMAL LIVER	4	Mouse Liver	100mg	mole %		0.5786			11.794	16.2384	0.4904	1.738	33.3516	18.6581	1.389		0.2945	0.3213		0.5979	6.2004	0.8887					0.4873	6.9719			0.4611	18.5878	1.6734		3.6078		38.2198	5.9304	13.1728	18.3469			0.0739	1.4631	0.061	0.2129
ACF_neg_NL7	UCSF-01435	21	Fasn_pos_ mice NORMAL LIVER	4	Mouse Liver	100mg	mole %		0.5488			9.0077	13.064	0.4386	1.6735	33.5875	23.8398	1.7524		0.3086	0.3175		0.6699	8.6879	0.9425						5.1614			0.5011	18.1294	1.9908		3.8462		39.1772	5.1347	12.5823	18.6383			0.1592	1.5556	0.0526	0.2554
ACF_neg_NL8	UCSF-01436	22	Fasn_pos_ mice NORMAL LIVER	4	Mouse Liver	100mg	mole %		0.5225		0.22	8.5413	12.4968	0.4345	1.6417	34.9024	23.2567	1.8775		0.2506	0.242		0.7868	8.3327	0.9961					0.2656	5.2327			0.3933	14.6413	1.5563		3.6463		38.9179	4.8374	14.5739	21.4338			0.1581	1.7485	0.0593	0.2498
ACF_neg_NL9	UCSF-01437	23	Fasn_pos_ mice NORMAL LIVER	4	Mouse Liver	100mg	mole %		0.6197		0.2012	9.8651	11.822	0.4723	1.6629	33.9516	22.5768	1.7901		0.3057	0.2987		0.785	9.2638	0.9166					0.3776	5.0909				16.1074	1.6713		3.4192		37.146	4.3634	15.6354	21.6573				1.7728	0.0718	0.2759
ACF_neg_NL10	UCSF-01438	24	Fasn_pos_ mice NORMAL LIVER	4	Mouse Liver	100mg	mole %		0.6566			8.6893	9.9801	0.3569	1.7572	33.8723	28.6322	0.9403		0.3778			0.7194	9.0796	0.3361					0.2128	4.3894			0.7517	26.0621	4.0276		7.4897		28.8414	4.469	9.6897	18.669			0.3683	1.8818	0.0626	0.1257
[truncated: 218 more columns]

## Sheet: Methods
Lipidomics Platform
Lipids were extracted from samples using dichloromethane and methanol in a modified Bligh-Dyer extraction in the presence of internal standards with the lower, organic, phase being used for analysis. The extracts were concentrated under nitrogen and reconstituted in 0.25mL of dichloromethane:methanol (50:50) containing 10mM ammonium acetate. The extracts were placed in vials for infusion-MS analy…
	Quality Control Sample Matrix	Median RSD
	Complex Lipid Panel	0.09
